# Supplementary material for: Towards Developing Novel Prostate Cancer Recurrence Suppressors: Acute Toxicity of Pseurotin A, an Orally Active PCSK9 Axis-Targeting Small-Molecule in Swiss Albino Mice
Source: MDPI journal article supplement (doi:10.3390/molecules28031460), 2023-02-02
Supplement: s1 [file s1]

# Towards Developing Novel Prostate Cancer Recurrence Suppressors: Acute Toxicity of Pseurotin A, an Orally Active PCSK9 Axis-Targeting Small-Molecule in Swiss albino Mice

Oliver C. McGehee <sup>1,2</sup> Hassan Y. Ebrahim <sup>1,2</sup> Ashkan H. Rad <sup>1</sup>, Khaldoun S. Abdelwahed <sup>1</sup>, Ethar A. Mudhish <sup>1</sup>, Judy A. King <sup>3</sup>, Iman E. Helal <sup>1,4</sup>, Sharon A. Meyer <sup>1</sup> and Khalid A. El Sayed <sup>1,\*</sup>

<sup>1</sup> School of Basic Pharmaceutical and Toxicological Sciences, College of Pharmacy, University of Louisiana at Monroe, 1800 Bienville Drive, Monroe, LA 71201, USA; mcgeheoc@warhawks.ulm.edu (O.M.); ebrahim@ulm.edu (H.E.); hassankhanirada@warhawks.ulm.edu (A.R.); abdelwks@warhawks.ulm.edu (K.A.); mudhishea@warhawks.ulm.edu (E.M.); dr\_eman\_ezzat@mans.edu.eg (I.H.); meyer@ulm.edu (S.M.)

<sup>2</sup> Both coauthors contributed equally.

<sup>3</sup> Department of Integrated Medical Education, Thomas F. Frist, Jr. College of Medicine, Belmont University, 1900 Belmont Boulevard, Nashville, TN 37212, USA; judy.king@belmont.edu

<sup>4</sup> Current address: Department of Pharmacognosy, Faculty of Pharmacy, Mansoura University, Mansoura 35516, Egypt

\* Correspondence: elsayed@ulm.edu

## Supplementary Material

**Figure S1.** NMR spectral data for isolated pseurotin A. (a) <sup>1</sup>H NMR spectrum of pseurotin A in CDCl<sub>3</sub> recorded at 400 MHz. (b) <sup>13</sup>C NMR spectrum of pseurotin A in CDCl<sub>3</sub> recorded at 100 MHz.

**Figure S2.** High-performance liquid chromatography (HPLC) chromatogram-aided purity assessment of isolated pseurotin A. Instrument: SHIMATZU; column: COSMOSIL C-18 (4.6 ID × 250 mm); mobile phase: 0.1 % HCOOH in water: acetonitrile (60:40) isocratic; UV detection: λ=254 nm.

**Figure S3.** High-performance liquid chromatography (HPLC) chromatogram evidencing the first detection of pseurotin A in Swiss albino mice plasma.

(a)

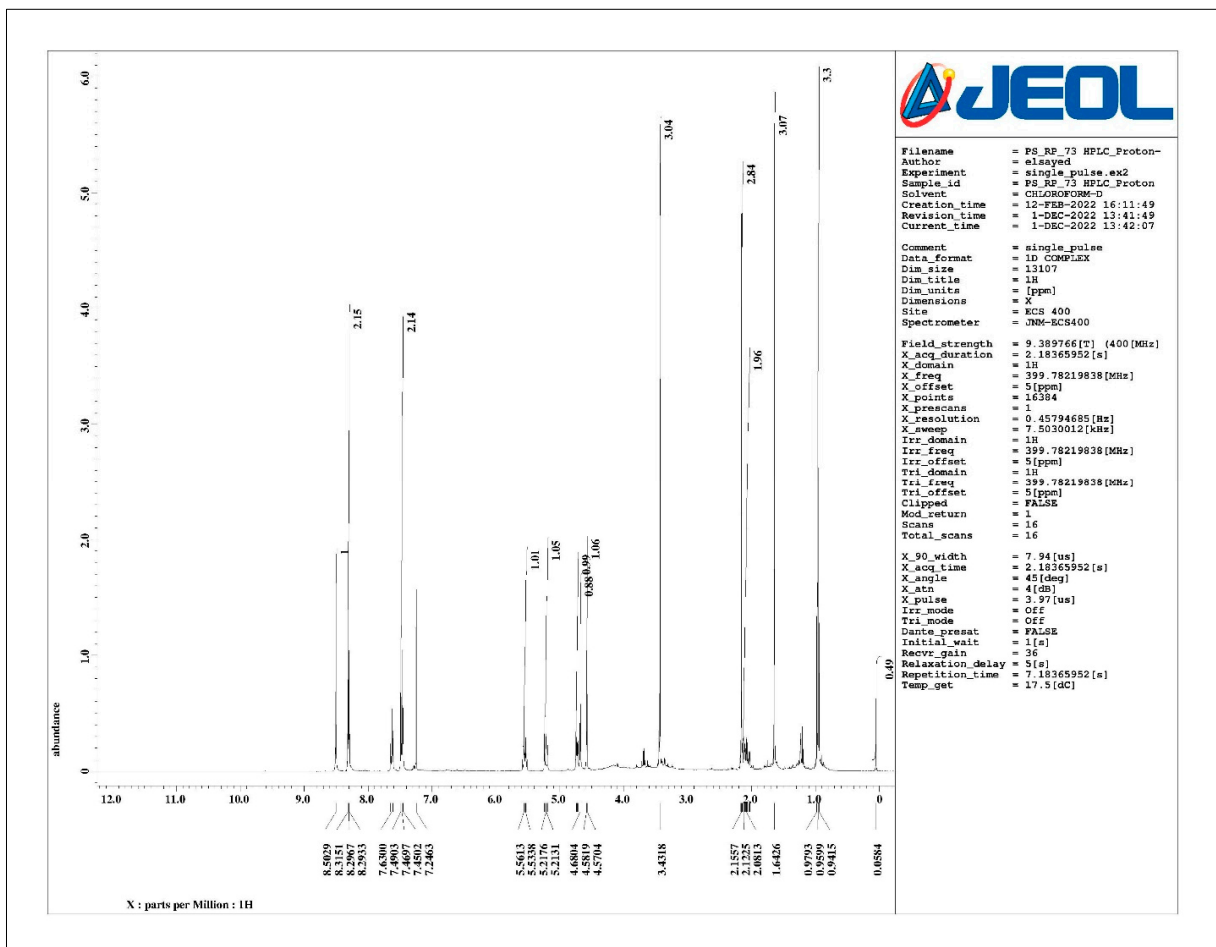

(b)

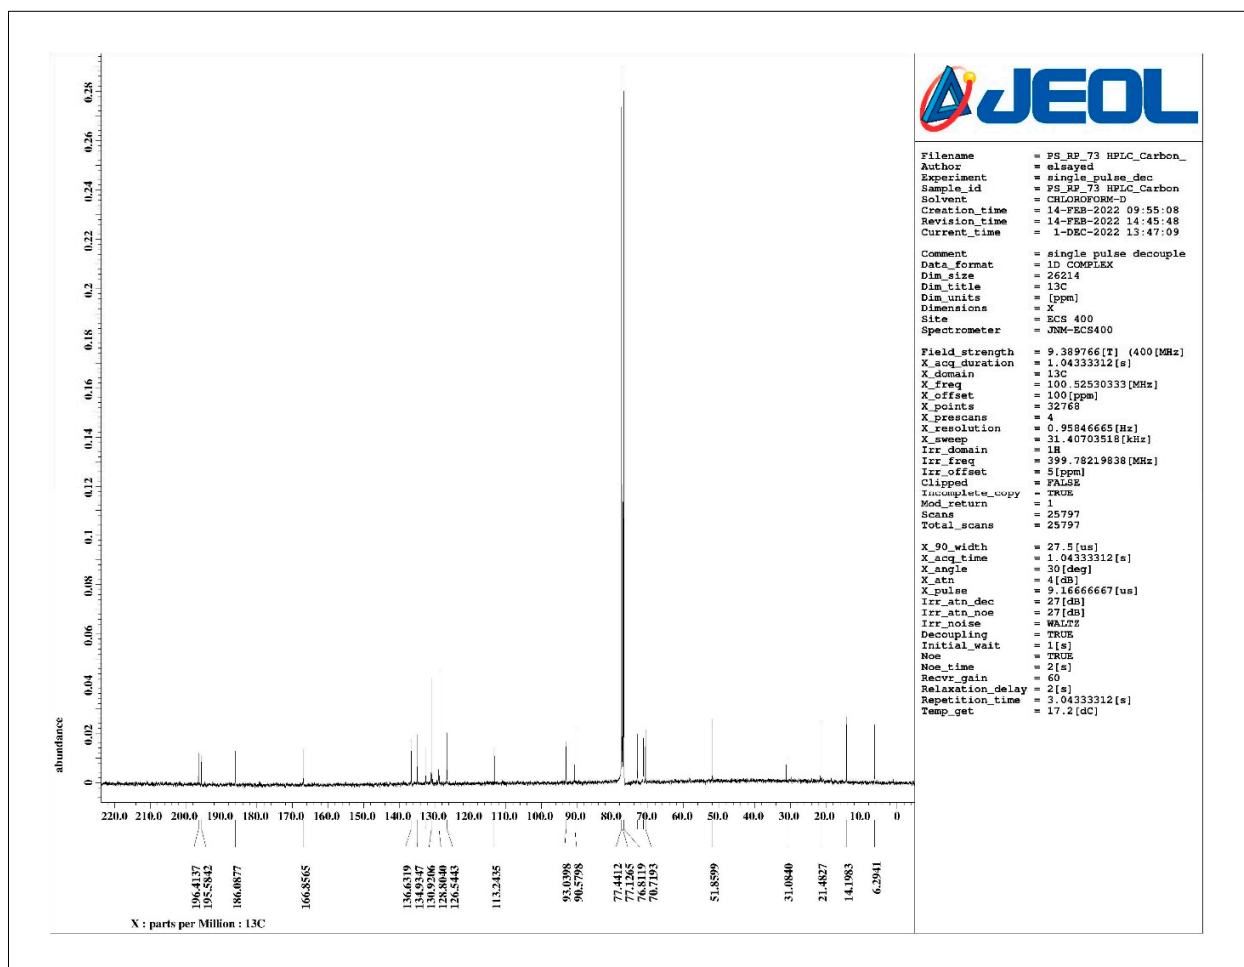

**Figure S1.** NMR spectra data for isolated pseurotin A. (a)  $^1\text{H}$  NMR spectrum of pseurotin A in  $\text{CDCl}_3$  recorded at 400 MHz. (b)  $^{13}\text{C}$  NMR spectrum of pseurotin A in  $\text{CDCl}_3$  recorded at 100 MHz.

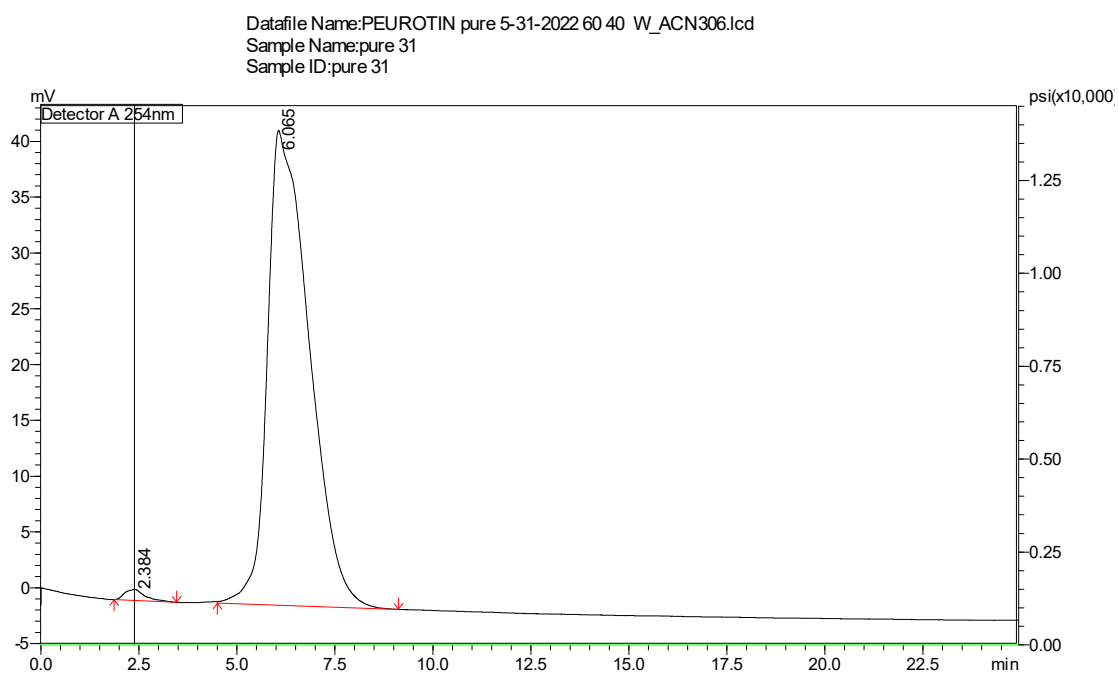

**Figure S2.** High-performance liquid chromatography (HPLC) chromatogram-aided purity assessment of isolated pseurotin A. Instrument: SHIMADZU; column: COSMOSIL C-18 (4.6 ID × 250 mm); mobile phase: 0.1 % HCOOH in water: acetonitrile (60:40) isocratic; UV detection:  $\lambda=254$  nm.

### <Chromatogram>

mV

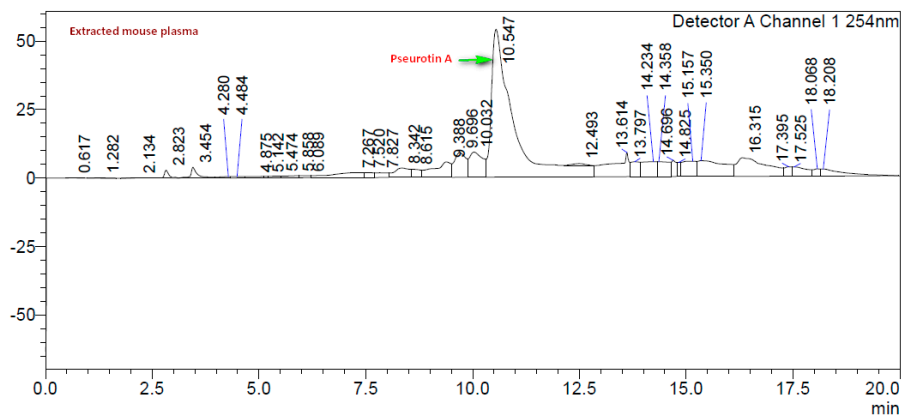

H<sub>2</sub>O (0.1 % HCOOH)/ACN gradient elution

**Figure S3.** High-performance liquid chromatography (HPLC) chromatogram evidencing the first detection of pseurotin A in Swiss albino mice serum. Instrument: SHIMADZU; column: COSMOSIL C-18 (4.6 ID × 250 mm); mobile phase: 0.1 % HCOOH in water: acetonitrile (60:40) isocratic; UV detection:  $\lambda=254$  nm.
